# Supplementary material for: Potenzieller Einfluss der Reizschwellenhöhe des nozizeptiven Flexorenreflex (NFRT) auf die Mortalitäts- und Delirinzidenz beim kritisch kranken Patienten: eine retrospektive Kohortenanalyse
Source: Springer Nature journal article supplement (doi:10.1007/s00101-022-01206-8), 2022-09-27
Supplement: MOESM1 [file 23543810]

**Zusatzmaterial zum Beitrag „Potentieller Einfluss der Reizschwellehöhe des nozizeptiven Flexionsreflexes auf die Mortalitäts- und Delirinzidenz beim kritisch kranken Patienten: eine retrospektive Kohortenanalyse“ von Schick B, Schmid S, Mayer B et al. (2022) in *Die Anaesthesiologie***

Beitrag und Zusatzmaterial stehen Ihnen auf [www.springermedizin.de](http://www.springermedizin.de) zur Verfügung. Bitte geben Sie dort den Beitragstitel in die Suche ein.

- Tabelle 1 - Übersicht über die Anzahl der Patienten und die Häufigkeit der NFRT-Messungen pro Reizschwellekorridor.
- Tabelle 2 – Vergleich der Höhe der NFRT nicht verstorbenen und verstorbenen, sowie nicht deliranter und deliranter Patienten.
- Tabelle 3 - Übersicht der Odds Ratios - NFRT und Mortalität, adjustiert für die aufgeführten Einflussfaktoren, getrennt nach Vergleich der Reizschwellekorridore der NFRT.
- Tabelle 4 - Übersicht der Odds Ratios - NFRT und Delir, adjustiert für die aufgeführten Einflussfaktoren, getrennt nach Vergleich der Reizschwellekorridore der NFRT.

**Tabelle 1 - Übersicht über die Anzahl der Patienten und die Häufigkeit der NFRT-Messungen pro Reizschwellekorridor.**

| Reizschwellekorridor           | Anzahl an NFRT-Messungen | Gesamtanzahl an Patienten je NFRT-Korridor | Mittlere Anzahl an NFRT-Messungen je Patient |
|--------------------------------|--------------------------|--------------------------------------------|----------------------------------------------|
| <b>Alle Patienten (n = 57)</b> |                          |                                            |                                              |
| < 20,0 mA                      | 95,0                     | 35,0                                       | 2,7                                          |
| 20,0–40,0 mA                   | 93,0                     | 30,0                                       | 3,1                                          |
| > 40,0 mA                      | 109,0                    | 34,0                                       | 3,2                                          |
| 20,0–50,0 mA                   | 125,0                    | 36,0                                       | 3,5                                          |
| > 50,0 mA                      | 77,0                     | 27,0                                       | 2,9                                          |
| 20,0–60,0 mA                   | 141,0                    | 36,0                                       | 4,0                                          |
| > 60,0 mA                      | 61,0                     | 22,0                                       | 2,8                                          |

NFRT: Nociceptive flexion reflex threshold/nozizeptive Flexionsreflexschwelle

Ergänzend ist die Anzahl an Patienten angegeben, bei denen die jeweilige NFRT mindestens einmal gemessen werden konnte sowie die durchschnittliche Anzahl an Messungen, je Patient.

**Tabelle 2 – Vergleich der Höhe der NFRT nicht verstorbener und verstorbener, sowie nicht deliranter und deliranter Patienten.**

|                                           | NFRT (mA)<br>Median/Mittelwert | Konfidenzintervall/Standardabweichung | p-Wert             |
|-------------------------------------------|--------------------------------|---------------------------------------|--------------------|
| <b>Nicht verstorben versus verstorben</b> |                                |                                       |                    |
| Tag 1 versus<br>Tag 1 <sup>†</sup>        | 69,00<br>51,60                 | 22,00–91,00<br>25,65–89,50            | 0,765 <sup>1</sup> |
| Tag 2 versus<br>Tag 2 <sup>†</sup>        | 51,60<br>31,50                 | 25,65–89,50<br>25,73–39,08            | 0,264 <sup>1</sup> |
| Tag 3 versus Tag3 <sup>†</sup>            | 82,00<br>39,00                 | 36,68–90,00<br>32,00–59,60            | 0,139 <sup>1</sup> |
| Tag 4 versus Tag<br>4 <sup>†</sup>        | 46,13<br>62,30                 | 42,02<br>35,38                        | 0,560 <sup>2</sup> |
| <b>Nicht delirant versus delirant</b>     |                                |                                       |                    |
| Tag 1 versus<br>Tag 1 <sub>Delir</sub>    | 36,90<br>40,00                 | 25,00–50,60<br>22,38–84,30            | 0,587 <sup>1</sup> |
| Tag 2 versus<br>Tag 2 <sub>Delir</sub>    | 28,57<br>34,70                 | 25,18–35,92<br>26,50–88,00            | 0,081 <sup>1</sup> |
| Tag 3 versus<br>Tag 3 <sub>Delir</sub>    | 39,00<br>69,00                 | 32,00–58,60<br>27,65–95,50            | 0,184 <sup>1</sup> |
| Tag 4 versus<br>Tag 4 <sub>Delir</sub>    | 66,47<br>49,26                 | 48,85<br>24,98                        | 0,510 <sup>2</sup> |

†: verstorben, <sup>1</sup>Mann-Whitney-U-Test, <sup>2</sup>gepaarter t-Test, NFRT = Nociceptive flexion reflex threshold/nozizeptive Flexionsreflexschwelle.

**Tabelle 3 - Übersicht der Odds Ratios - NFRT und Mortalität, adjustiert für die aufgeführten Einflussfaktoren, getrennt nach Vergleich der Reizschwellenkorridore der NFRT.**

| <b>NFRT adjustiert für</b> | <b>OR &gt; 40 vs. 20–40 mA</b> | <b>Konfidenzintervall</b> |         | <b>P</b> |
|----------------------------|--------------------------------|---------------------------|---------|----------|
| Mortalität                 | 1,9277                         | 0,5779                    | 6,4306  | 0,2856   |
| Alter                      | 1,9067                         | 0,5752                    | 6,3200  | 0,2912   |
| Geschlecht                 | 1,7807                         | 0,5193                    | 6,1067  | 0,3588   |
| Größe                      | 2,0109                         | 0,5876                    | 6,8816  | 0,2658   |
| TISS-28                    | 1,0003                         | 0,1712                    | 5,8442  | 0,9998   |
| SAPSII                     | 1,2452                         | 0,3405                    | 4,5534  | 0,7403   |
| RASS                       | 1,3389                         | 0,3907                    | 4,5880  | 0,6423   |
| BPS                        | 1,9088                         | 0,5564                    | 6,5480  | 0,3040   |
| Remifentanil               | 0,7788                         | 0,2297                    | 2,6408  | 0,6882   |
| <b>NFRT adjustiert für</b> |                                |                           |         |          |
| <b>NFRT adjustiert für</b> | <b>OR &gt; 50 vs. 20–50 mA</b> | <b>Konfidenzintervall</b> |         | <b>P</b> |
| Alter                      | 3,3248                         | 0,8952                    | 12,3481 | 0,0727   |
| Geschlecht                 | 2,7942                         | 0,7158                    | 10,9074 | 0,1392   |
| Größe                      | 3,0372                         | 0,8001                    | 11,5295 | 0,1026   |
| TISS-28                    | 2,0615                         | 0,3615                    | 11,7572 | 0,4154   |
| SAPSII                     | 2,386                          | 0,6857                    | 12,5933 | 0,1466   |
| RASS                       | 2,2168                         | 0,5957                    | 8,2489  | 0,2351   |
| BPS                        | 3,2967                         | 0,8587                    | 12,6558 | 0,0822   |
| Remifentanil               | 1,4667                         | 0,3986                    | 5,3974  | 0,5645   |
| <b>NFRT adjustiert für</b> |                                |                           |         |          |
| <b>NFRT adjustiert für</b> | <b>OR &gt; 60 vs. 20–60 mA</b> | <b>Konfidenzintervall</b> |         | <b>P</b> |
| Mortalität                 | 3,5875                         | 0,9067                    | 14,1946 | 0,0687   |
| Alter                      | 3,5654                         | 0,9054                    | 14,0409 | 0,0691   |
| Geschlecht                 | 3,0721                         | 0,7396                    | 12,7608 | 0,1224   |
| Größe                      | 3,3463                         | 0,8169                    | 13,7078 | 0,0932   |
| TISS-28                    | 2,6835                         | 0,4744                    | 15,1784 | 0,2642   |
| SAPSII                     | 4,1441                         | 0,9692                    | 17,7198 | 0,0551   |
| RASS                       | 2,5856                         | 0,6666                    | 10,0287 | 0,1696   |
| BPS                        | 3,5676                         | 0,8912                    | 14,2824 | 0,0723   |
| Remifentanil               | 1,6607                         | 0,4013                    | 6,8727  | 0,4839   |
| <b>NFRT adjustiert für</b> |                                |                           |         |          |
| <b>NFRT adjustiert für</b> | <b>OR &lt; 20 vs. 20–40 mA</b> | <b>Konfidenzintervall</b> |         | <b>P</b> |
| Mortalität                 | 1,2463                         | 0,6425                    | 2,4177  | 0,5148   |
| Alter                      | 1,2713                         | 0,6824                    | 2,3684  | 0,4496   |
| Geschlecht                 | 1,3426                         | 0,6849                    | 2,6320  | 0,3910   |
| Größe                      | 1,5368                         | 0,7690                    | 3,0714  | 0,2238   |
| TISS-28                    | 0,3689                         | 0,2221                    | 1,9732  | 0,4592   |
| SAPSII                     | 0,8579                         | 0,3226                    | 2,2812  | 0,7587   |
| RASS                       | 1,5654                         | 0,8237                    | 2,9750  | 0,1713   |
| BPS                        | 1,2667                         | 0,6419                    | 2,4994  | 0,4954   |
| Remifentanil               | 0,4931                         | 0,1732                    | 1,4040  | 0,1854   |
| <b>NFRT adjustiert für</b> |                                |                           |         |          |
| <b>NFRT adjustiert für</b> | <b>OR &lt; 20 vs. 20–50 mA</b> | <b>Konfidenzintervall</b> |         | <b>P</b> |
| Mortalität                 | 1,4852                         | 0,7180                    | 3,0725  | 0,2862   |
| Alter                      | 1,5260                         | 0,7743                    | 3,0077  | 0,2221   |
| Geschlecht                 | 1,5574                         | 0,7625                    | 3,1809  | 0,2241   |
| Größe                      | 1,7091                         | 0,7948                    | 3,6751  | 0,1700   |
| TISS-28                    | 0,9491                         | 0,3184                    | 2,8292  | 0,9253   |
| SAPSII                     | 1,2161                         | 0,4673                    | 3,1646  | 0,6885   |
| RASS                       | 1,8576                         | 0,9137                    | 3,7768  | 0,0871   |
| BPS                        | 1,5075                         | 0,7098                    | 3,2017  | 0,2855   |
| Remifentanil               | 0,6382                         | 0,2089                    | 1,9503  | 0,4307   |
| <b>NFRT adjustiert für</b> |                                |                           |         |          |
| <b>NFRT adjustiert für</b> | <b>OR &lt; 20 vs. 20–60 mA</b> | <b>Konfidenzintervall</b> |         | <b>P</b> |
| Mortalität                 | 1,384                          | 0,6252                    | 3,0637  | 0,4229   |
| Alter                      | 1,4204                         | 0,6702                    | 3,0107  | 0,3598   |

|              |        |        |        |        |
|--------------|--------|--------|--------|--------|
| Geschlecht   | 1,4806 | 0,6696 | 3,274  | 0,3324 |
| Größe        | 1,6149 | 0,6969 | 3,7423 | 0,2637 |
| TISS-28      | 1,0429 | 0,3558 | 3,0563 | 0,939  |
| SAPSII       | 1,3218 | 0,5272 | 3,3141 | 0,5519 |
| RASS         | 1,8539 | 0,8472 | 4,0569 | 0,1224 |
| BPS          | 1,1411 | 0,6138 | 3,2455 | 0,4173 |
| Remifentanyl | 0,6354 | 0,2078 | 1,9428 | 0,4264 |

OR: Odds ratio, P: p-Wert, TISS-28: Therapeutic Intervention Scoring System-28, SAPSII: Simplified Acute Physiology Score II, RASS: Richmond Agitation Sedation Scale, BPS: Behavioral Pain Scale.

**Tabelle 4 - Übersicht der Odds Ratios - NFRT und Delir, adjustiert für die aufgeführten Einflussfaktoren, getrennt nach Vergleich der Reizschwellenkorridore der NFRT.**

| <b>NFRT adjustiert für</b> | <b>OR &gt; 60 vs. 20–60 mA</b> | <b>Konfidenzintervall</b> |        | <b>P</b> |
|----------------------------|--------------------------------|---------------------------|--------|----------|
| Delir                      | 0,6596                         | 0,1687                    | 2,5793 | 0,5497   |
| Alter                      | 0,6093                         | 0,1418                    | 2,6179 | 0,5054   |
| Geschlecht                 | 0,4546                         | 0,1174                    | 1,7606 | 0,2538   |
| Größe                      | 0,5695                         | 0,1587                    | 2,0438 | 0,3878   |
| TISS-28                    | 0,2995                         | 0,0789                    | 1,1372 | 0,0756   |
| SAPSII                     | 0,2621                         | 0,0657                    | 1,0458 | 0,0579   |
| RASS                       | 0,7352                         | 0,1794                    | 3,013  | 0,6691   |
| BPS                        | 0,6681                         | 0,1693                    | 2,6371 | 0,5648   |
| Sufentanil                 | 0,5718                         | 0,0765                    | 4,2723 | 0,5859   |
| Remifentanil               | 0,488                          | 0,0747                    | 3,1869 | 0,4537   |
| <b>NFRT adjustiert für</b> |                                |                           |        |          |
| <b>NFRT adjustiert für</b> | <b>OR &gt; 50 vs. 20–50 mA</b> | <b>Konfidenzintervall</b> |        | <b>P</b> |
| Delir                      | 0,7615                         | 0,2590                    | 2,2385 | 0,6204   |
| Alter                      | 0,7161                         | 0,2195                    | 2,3361 | 0,5799   |
| Geschlecht                 | 0,5048                         | 0,1756                    | 1,4513 | 0,2046   |
| Größe                      | 0,6473                         | 0,2387                    | 1,7549 | 0,3927   |
| TISS-28                    | 0,5706                         | 0,1558                    | 2,0902 | 0,3970   |
| SAPSII                     | 0,4813                         | 0,1397                    | 1,6583 | 0,2466   |
| RASS                       | 0,8767                         | 0,2971                    | 2,5874 | 0,8117   |
| BPS                        | 0,7765                         | 0,2610                    | 2,3106 | 0,6493   |
| Sufentanil                 | 0,3813                         | 0,0685                    | 2,1219 | 0,2709   |
| Remifentanil               | 0,8585                         | 0,2171                    | 3,3955 | 0,8278   |
| <b>NFRT adjustiert für</b> |                                |                           |        |          |
| <b>NFRT adjustiert für</b> | <b>OR &gt; 40 vs. 20–40 mA</b> | <b>Konfidenzintervall</b> |        | <b>P</b> |
| Delir                      | 0,6687                         | 0,3158                    | 1,4159 | 0,2931   |
| Alter                      | 0,6086                         | 0,2609                    | 1,4196 | 0,2505   |
| Geschlecht                 | 0,5258                         | 0,2244                    | 1,2318 | 0,1389   |
| Größe                      | 0,6592                         | 0,3127                    | 1,3896 | 0,2734   |
| TISS-28                    | 0,5864                         | 0,2344                    | 1,4667 | 0,2538   |
| SAPSII                     | 0,4994                         | 0,2162                    | 1,1538 | 0,1041   |
| RASS                       | 0,7382                         | 0,3456                    | 1,5768 | 0,4331   |
| BPS                        | 0,6826                         | 0,3133                    | 1,4873 | 0,3366   |
| Sufentanil                 | 0,4133                         | 0,1000                    | 1,7082 | 0,2223   |
| Remifentanil               | 0,7405                         | 0,2619                    | 2,0939 | 0,5711   |
| <b>NFRT adjustiert für</b> |                                |                           |        |          |
| <b>NFRT adjustiert für</b> | <b>OR &lt; 20 vs. 20–60 mA</b> | <b>Konfidenzintervall</b> |        | <b>P</b> |
| Delir                      | 0,4406                         | 0,1648                    | 1,178  | 0,1024   |
| Alter                      | 0,4255                         | 0,1759                    | 1,0293 | 0,058    |
| Geschlecht                 | 0,4311                         | 0,1746                    | 1,0645 | 0,0681   |
| Größe                      | 0,4797                         | 0,1828                    | 1,2588 | 0,1356   |
| TISS-28                    | 0,2613                         | 0,0744                    | 0,9171 | 0,0362   |
| SAPSII                     | 0,2776                         | 0,0751                    | 1,0258 | 0,0546   |
| RASS                       | 0,4051                         | 0,1405                    | 1,1682 | 0,0945   |
| BPS                        | 0,4204                         | 0,1467                    | 1,2047 | 0,1067   |
| Sufentanil                 | 0,9475                         | 0,3387                    | 2,6501 | 0,9181   |
| Remifentanil               | 0,639                          | 0,1591                    | 2,566  | 0,5278   |
| <b>NFRT adjustiert für</b> |                                |                           |        |          |
| <b>NFRT adjustiert für</b> | <b>OR &lt; 20 vs. 20–50 mA</b> | <b>Konfidenzintervall</b> |        | <b>P</b> |
| Delir                      | 0,4495                         | 0,1724                    | 1,1719 | 0,1019   |
| Alter                      | 0,4362                         | 0,1879                    | 1,0130 | 0,0536   |
| Geschlecht                 | 0,4201                         | 0,1777                    | 0,9930 | 0,0482   |
| Größe                      | 0,4805                         | 0,1884                    | 1,2259 | 0,1251   |
| TISS-28                    | 0,3007                         | 0,0842                    | 1,0739 | 0,0643   |
| SAPSII                     | 0,3042                         | 0,0824                    | 1,1233 | 0,0742   |

|                            |                                |                           |        |          |
|----------------------------|--------------------------------|---------------------------|--------|----------|
| RASS                       | 0,4176                         | 0,1482                    | 1,1770 | 0,0986   |
| BPS                        | 0,4305                         | 0,1561                    | 1,1878 | 0,1036   |
| Sufentanil                 | 0,7859                         | 0,2764                    | 2,2347 | 0,6514   |
| Remifentanil               | 0,7097                         | 0,1865                    | 2,7006 | 0,6151   |
| <b>NFRT adjustiert für</b> |                                |                           |        |          |
| <b>NFRT adjustiert für</b> | <b>OR &lt; 20 vs. 20–40 mA</b> | <b>Konfidenzintervall</b> |        | <b>P</b> |
| Alter                      | 0,3790                         | 0,1816                    | 0,7913 | 0,0098   |
| Geschlecht                 | 0,3908                         | 0,1801                    | 0,8464 | 0,0172   |
| Größe                      | 0,4520                         | 0,2005                    | 1,0191 | 0,0556   |
| TISS-28                    | 0,2793                         | 0,0856                    | 0,9115 | 0,0345   |
| SAPSII                     | 0,2782                         | 0,0821                    | 0,9426 | 0,0399   |
| RASS                       | 0,3782                         | 0,1517                    | 0,9428 | 0,0369   |
| BPS                        | 0,387                          | 0,1601                    | 0,9356 | 0,0350   |
| Sufentanil                 | 0,6992                         | 0,2281                    | 2,1429 | 0,5312   |

OR: Odds ratio, P: p-Wert, TISS-28: Therapeutic Intervention Scoring System-28, SAPSII: Simplified Acute Physiology Score II, RASS: Richmond Agitation Sedation Scale, BPS: Behavioral Pain Scale.
